## RETRACTION

## Retraction: APPL1-Mediating Leptin Signaling Contributes to Proliferation and Migration of Cancer Cells

The *PLOS ONE* Editors

Following the publication of this article [1], concerns were raised regarding results presented in Figs 1, 4, 5, 6, and 7. Specifically,

The following panels appear similar:

- The Fig. 4A HepG2 Tubulin and MCF Tubulin panels.
- The Fig. 7A HepG2 Tubulin and MCF Tubulin panels.
- Lanes 1–4 of the Fig. 1D Tubulin panel of this study [1] and the Fig. 1D Tubulin panel of [2].
- The Fig. 4A MCF p-AKT panel of this study [1], lanes 3–6 of the Fig. 4A p-STAT3 panel of [3], and the Fig. 2B p-AS160 panel of [4].
- The Fig. 4A MCF7 ERK panel of this study [1] and lanes 1–4 of the Fig. 6D ERK1/2 panel of [5, note of concern published in 6].
- Lanes 1–3 of the Fig. 5A MCF7 p-JAK2 of this study [1] and the Fig. 5D OPN panel of [7] when flipped horizontally.
- Lanes 1–2 of the Fig. 6A MCF7 Input STAT3 panel of this study [1] and lanes 2–3 of the Fig. S2 STAT3 panel of [3].
- The Fig. 6B MCF7 Lysate p-STAT3 panel of this study [1] and lanes 2–5 of the Fig. 4A GRP78 panel of [3] when flipped horizontally.
- Lanes 2–4 of the Fig. 6B HepG2 Lysate p-STAT3 panel of this study [1] and the Fig. 8C p62 panel of [8].
- The Fig. 6B MCF7 STAT3 panel of this study [1] and the Fig. 7E Tubulin panel of [4].
- The Fig. 6B HepG2 Lysate APPL1 panel of this study [1] and the Fig. 3G PDK1 panel of [9].
- Lanes 2–5 of the Fig. 7A HepG2 p-STAT3 panel of this study [1] and the Fig. 5C Akt panel of [8].
- Lanes 1–3 of the Fig. 7A MCF7 p-AKT panel of this study [1] and the Fig. S2 p-STAT3 panel of [3].
- Lanes 1–4 of the Fig. 7A MCF7 AKT panel of this study [1] and the Fig. 3D Tubulin panel of [8].

The corresponding author commented that some western blot images were misused in this article [1] and requested the retraction of the article.

In light of the concerns affecting multiple figure panels that question the integrity of these data, the *PLOS ONE* Editors retract this article.

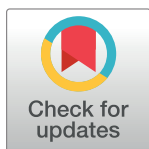

## OPEN ACCESS

**Citation:** The *PLOS ONE* Editors (2023) Retraction: APPL1-Mediating Leptin Signaling Contributes to Proliferation and Migration of Cancer Cells. *PLoS ONE* 18(3): e0283346. <https://doi.org/10.1371/journal.pone.0283346>

**Published:** March 15, 2023

**Copyright:** © 2023 The *PLOS ONE* Editors. This is an open access article distributed under the terms of the [Creative Commons Attribution License](https://creativecommons.org/licenses/by/4.0/), which permits unrestricted use, distribution, and reproduction in any medium, provided the original author and source are credited.

CW agreed with the retraction. YD, YC, BW, LW, YZ, DZ, XC, and ML either did not respond directly or could not be reached.

## References

1. Ding Y, Cao Y, Wang B, Wang L, Zhang Y, Zhang D, et al. (2016) APPL1-Mediating Leptin Signaling Contributes to Proliferation and Migration of Cancer Cells. *PLoS ONE* 11(11): e0166172. <https://doi.org/10.1371/journal.pone.0166172>
2. Liu W, Tian X, Wu T, Liu L, Guo Y, and Wang C (2019) PDE5A Suppresses Proteasome Activity Leading to Insulin Resistance in C2C12 Myotubes. *International Journal of Endocrinology*. <https://doi.org/10.1155/2019/3054820>
3. Yao X, Liu H, Zhang X, Zhang L, Li X, Wang C, et al. (2015) Cell Surface GRP78 Accelerated Breast Cancer Cell Proliferation and Migration by Activating STAT3. *PLoS ONE* 10(5): e0125634. <https://doi.org/10.1371/journal.pone.0125634>
4. Li M, Zhang Y, Cao Y, Zhang D, Liu L, Guo Y and Wang C (2018) Icaritin Ameliorates Palmitate-Induced Insulin Resistance Through Reducing Thioredoxin-Interacting Protein (TXNIP) and Suppressing ER Stress in C2C12 Myotubes. *Front. Pharmacol.* 9:1180. <https://doi.org/10.3389/fphar.2018.01180>
5. Sun S, Liu L, Tian X, Guo Y, Cao Y, Mei Y, et al. (2019) Icaritin Attenuates High Glucose-Induced Apoptosis, Oxidative Stress, and Inflammation in Human Umbilical Venous Endothelial Cells. *Planta Med* 85(06): 473–482. <https://doi.org/10.1055/a-0837-0975>
6. Sun S, Liu L, Tian X, Guo Y, Cao Y, Mei Y, Wang C. (2019) Note of Concern: Icaritin Attenuates High Glucose-Induced Apoptosis, Oxidative Stress, and Inflammation in Human Umbilical Venous Endothelial Cells. *Planta Med* 85(06): e5 <https://doi.org/10.1055/a-1995-8160>
7. Jiang P, Zhang D, Qiu H, Yi X, Zhang Y, Cao Y, et al. (2017) Tiron ameliorates high glucose-induced cardiac myocyte apoptosis by PKC $\delta$ -dependent inhibition of osteopontin. *Clinical and Experimental Pharmacology and Physiology* 44(7): 760–770. <https://doi.org/10.1111/1440-1681.12762>
8. Guan F, Ding Y, Zhang Y, Zhou Y, Li M, Wang C (2016) Curcumin Suppresses Proliferation and Migration of MDA-MB-231 Breast Cancer Cells through Autophagy-Dependent Akt Degradation. *PLoS ONE* 11(1): e0146553. <https://doi.org/10.1371/journal.pone.0146553>
9. Wen Z, Li J, Fu Y, Zhang Y, Ma M, and Wang C (2020) Hypertrophic Adipocyte-Derived Exosomal miR-802-5p Contributes to Insulin Resistance in Cardiac Myocytes Through Targeting HSP60. *Obesity* 28(10): 1932–1940. <https://doi.org/10.1002/oby.22932>
